# Supplementary material for: Diagnostic Distinction of Malignant Melanoma and Benign Nevi by a Gene Expression Signature and Correlation to Clinical Outcomes
Source: Oxford University Press journal article supplement (doi:10.1158/1055-9965.epi-16-0958), 2017-04-04

**Supplemental Figure 2.** This lesion from the right upper back of a 71 year old male was classified as a superficial spreading melanoma ex nevus (Breslow thickness 0.69 mm, mitotic index 1/mm<sup>2</sup>, ulceration absent). The score was +4.1 Metastases to the soft tissue of the right neck developed 16 months after initial diagnosis.

A.

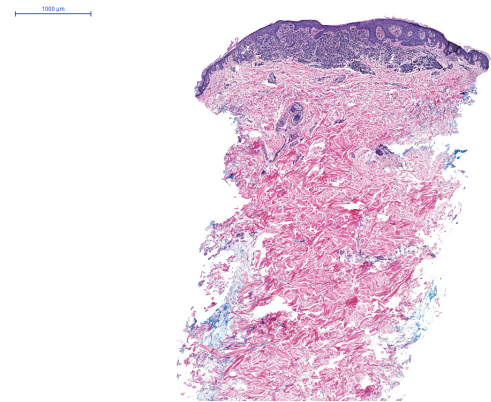

B.

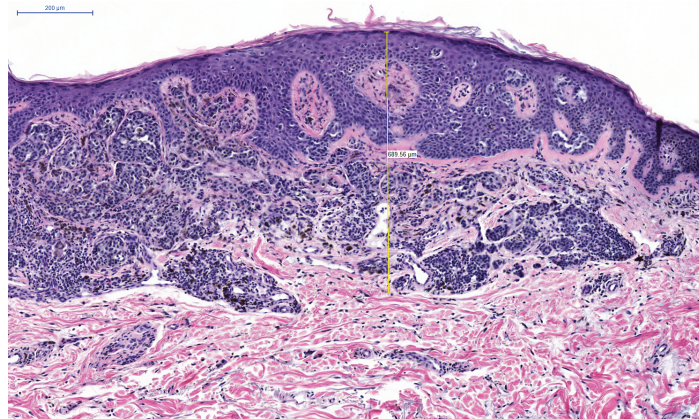

C.

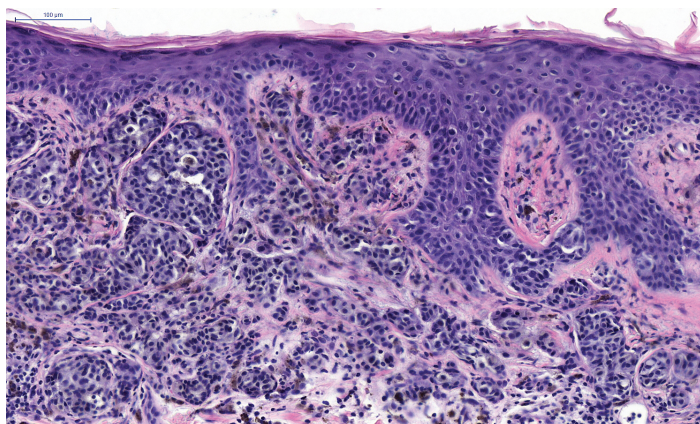

D.

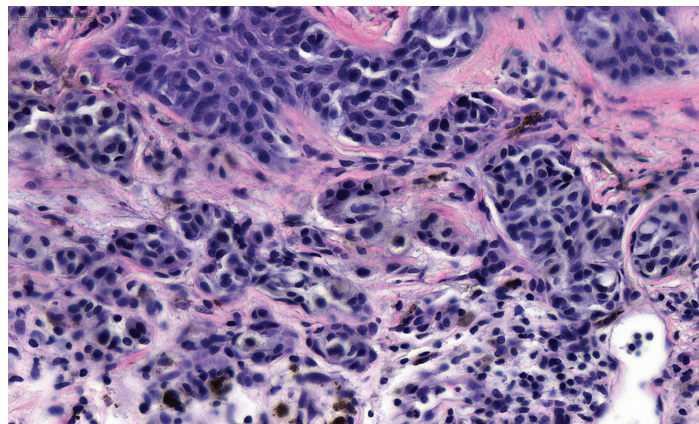

Supplement: 10559965epi160958-sup-174994_2_supp_3888129_pm5c58.pdf [file 10559965epi160958-sup-174994_2_supp_3888129_pm5c58.pdf]
